# Supplementary material
Source: PubMed Central journal article supplement (PMC2268146)

# Atomic fitting

Reconstruction

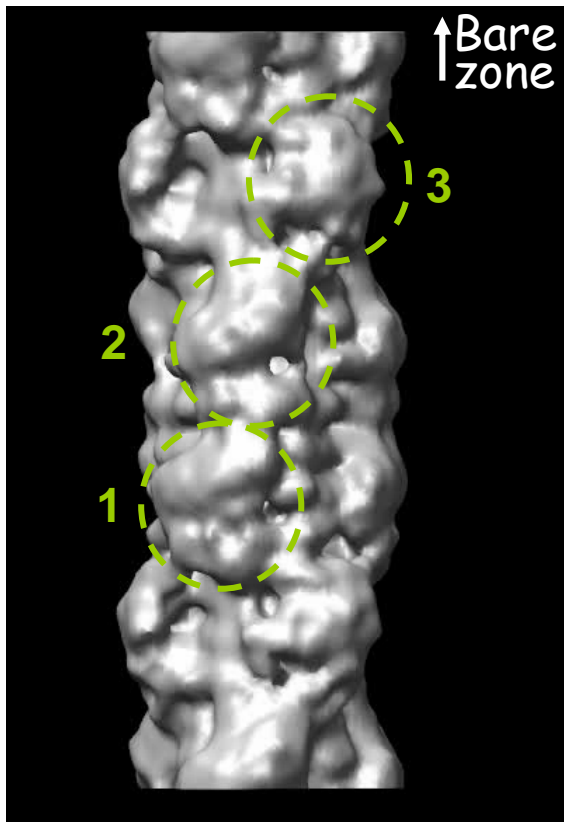

Atomic model  
(Woodhead et al., 2005)

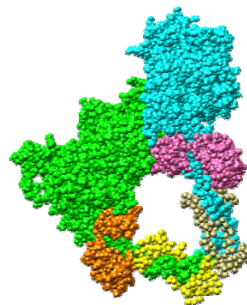

# Atomic fitting

Reconstruction

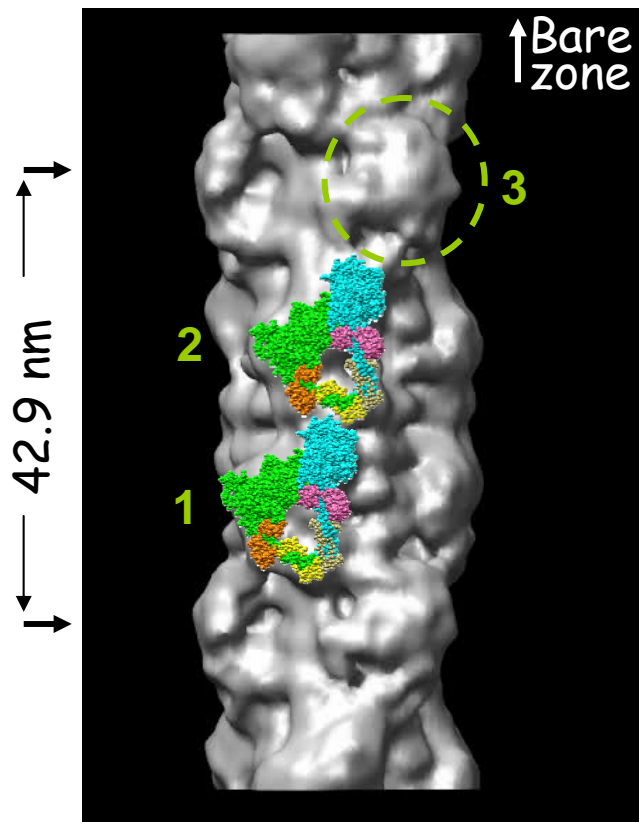

Atomic model  
(Woodhead et al., 2005)

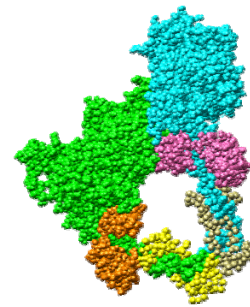

Supplement: supp_0708912105_08912Fig9.pdf [file supp_0708912105_08912Fig9.pdf]
