# Supplementary material
Source: PubMed Central journal article supplement (PMC2268146)

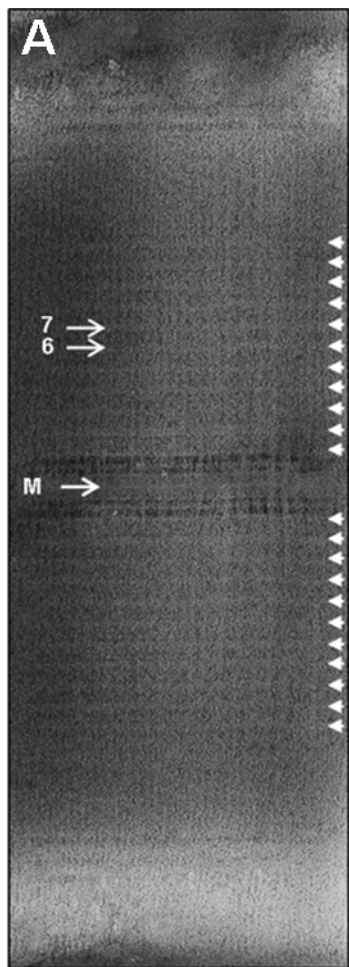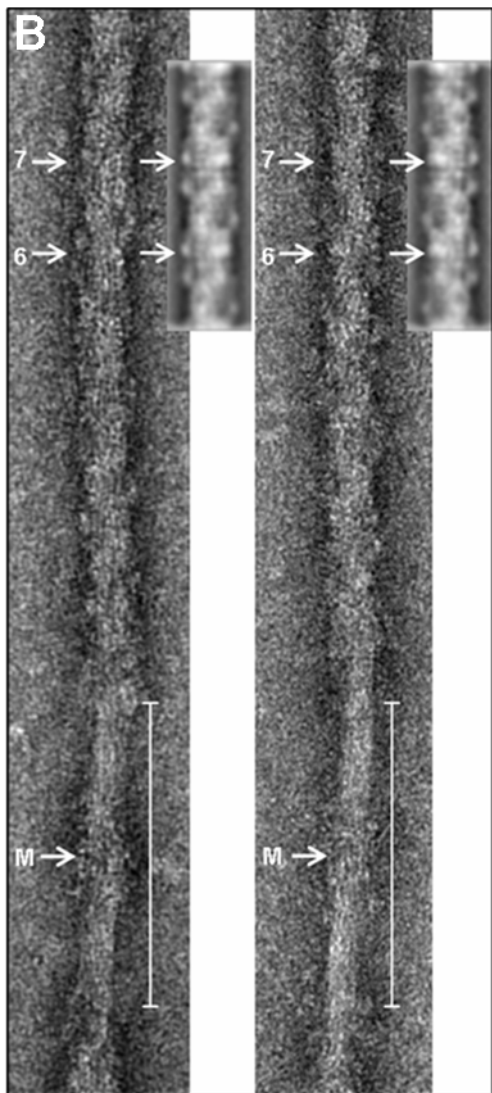

Supplement: supp_0708912105_08912Fig10.pdf [file supp_0708912105_08912Fig10.pdf]

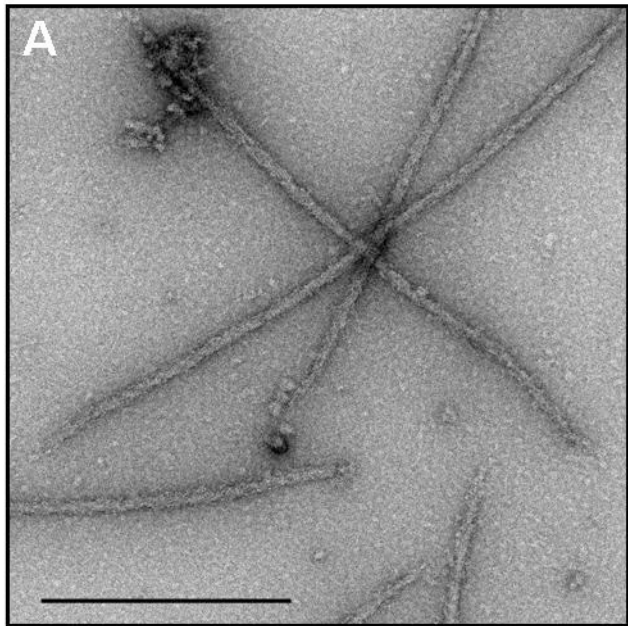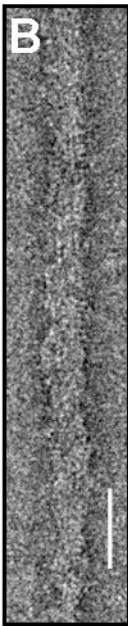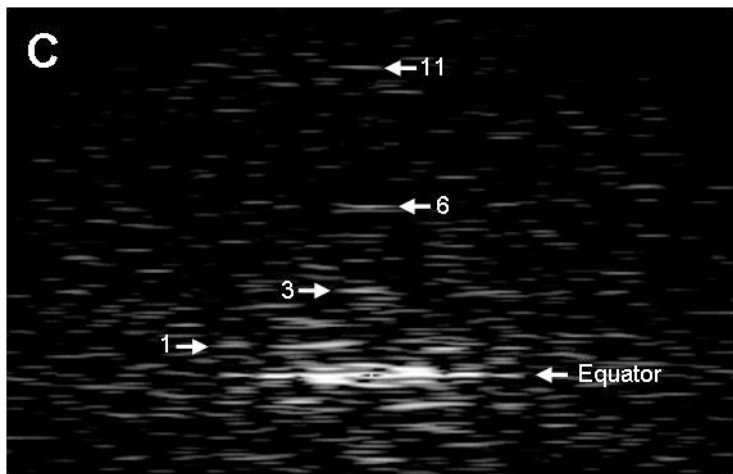

Supplement: supp_0708912105_08912Fig11.pdf [file supp_0708912105_08912Fig11.pdf]

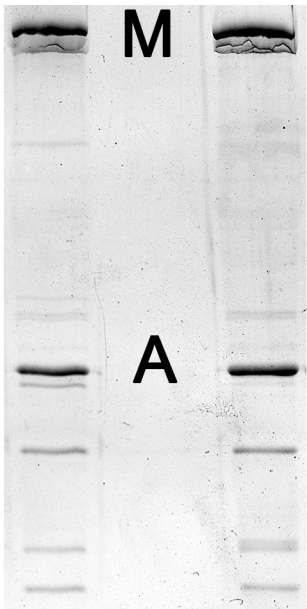

**Before**

**After**

Supplement: supp_0708912105_08912Fig5.pdf [file supp_0708912105_08912Fig5.pdf]

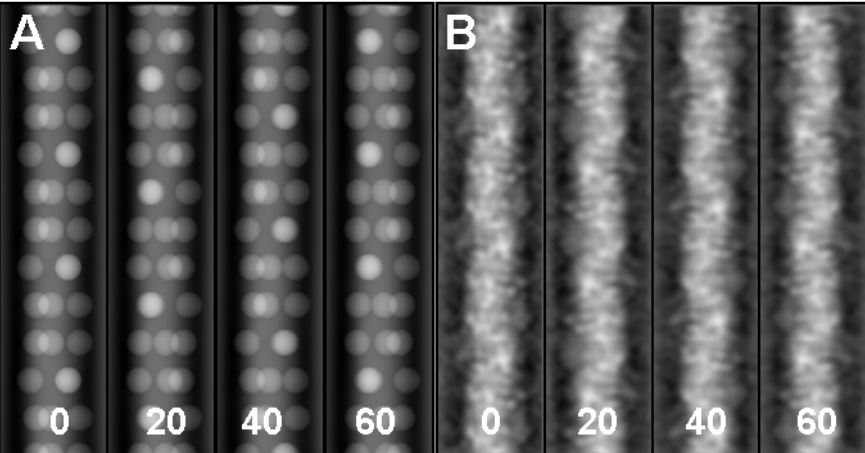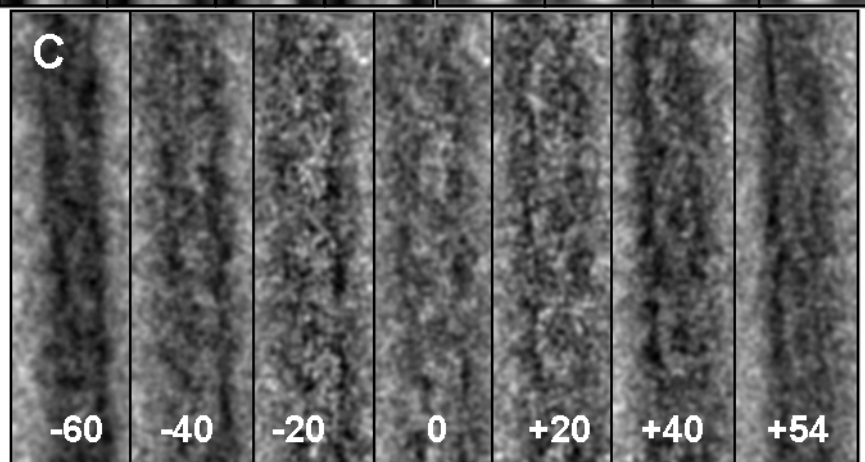

Supplement: supp_0708912105_08912Fig6.pdf [file supp_0708912105_08912Fig6.pdf]

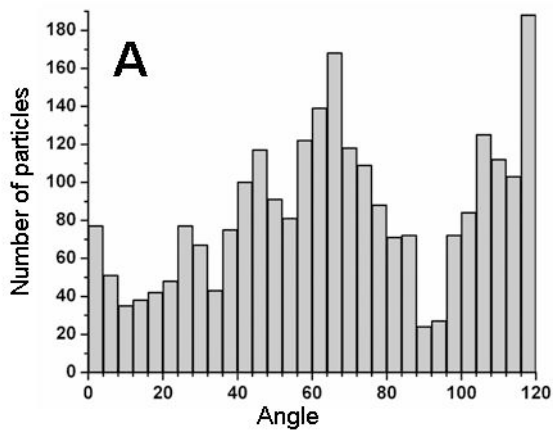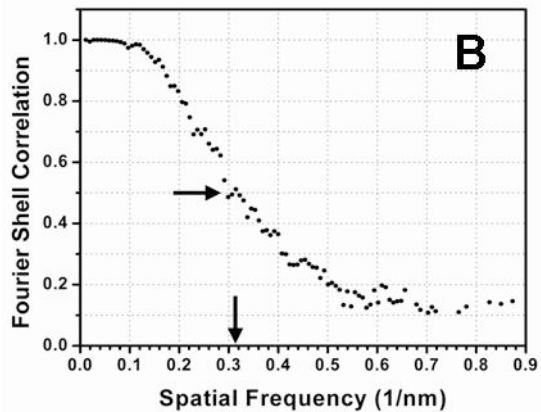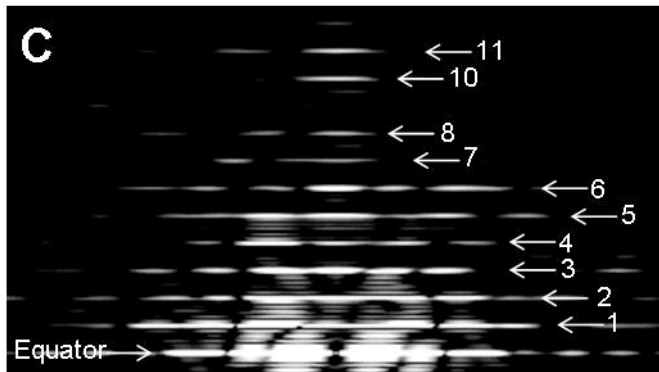

Supplement: supp_0708912105_08912Fig7.pdf [file supp_0708912105_08912Fig7.pdf]

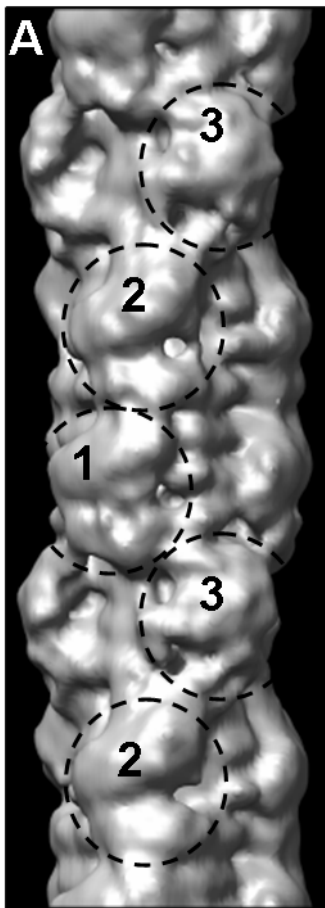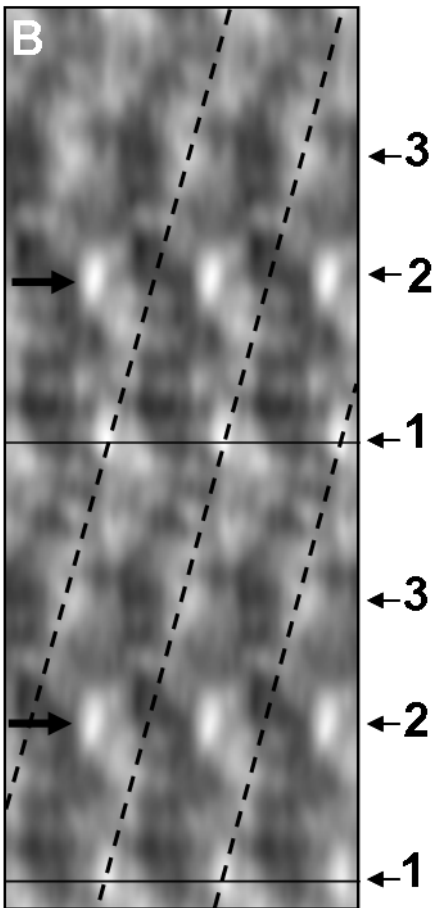

Supplement: supp_0708912105_08912Fig8.pdf [file supp_0708912105_08912Fig8.pdf]
